# Supplementary material for: Order–disorder transition in soft and deformable particle assembly with dynamic size-dispersity in two dimensions
Source: Royal Society of Chemistry journal article supplement (doi:10.1039/d5sm01097g), 2026-01-01
Supplement: d5sm01097g1.pdf [file d5sm01097g1.pdf]

**Supporting information for**  
**Order-disorder transition in soft and deformable particle assembly with dynamic size-**  
**dispersity in two dimensions**

Rahul Kumar<sup>1</sup>, Sangwoo Lee<sup>1</sup>, Patrick T. Underhill<sup>1</sup>

<sup>1</sup> Department of Chemical and Biological Engineering, Rensselaer Polytechnic Institute,  
Troy, New York 12180

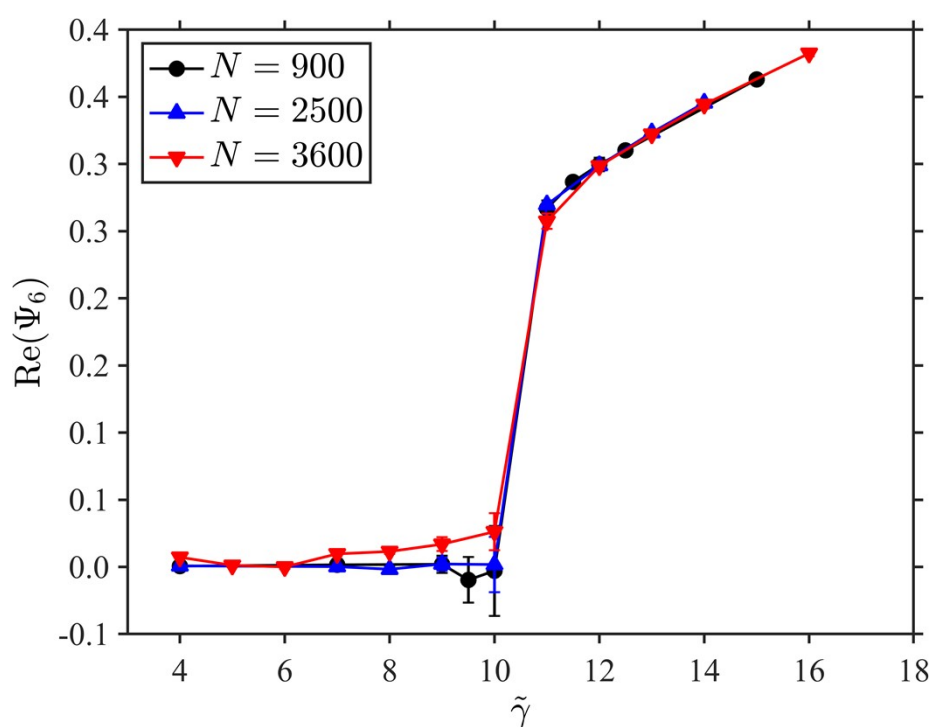

**Fig. S1** Mean global orientational order parameter (see eqn (5) in the main text) with  $\tilde{\gamma}$  at  $k = 100$  for three different system sizes. The system size shows negligible effect on the system behavior.

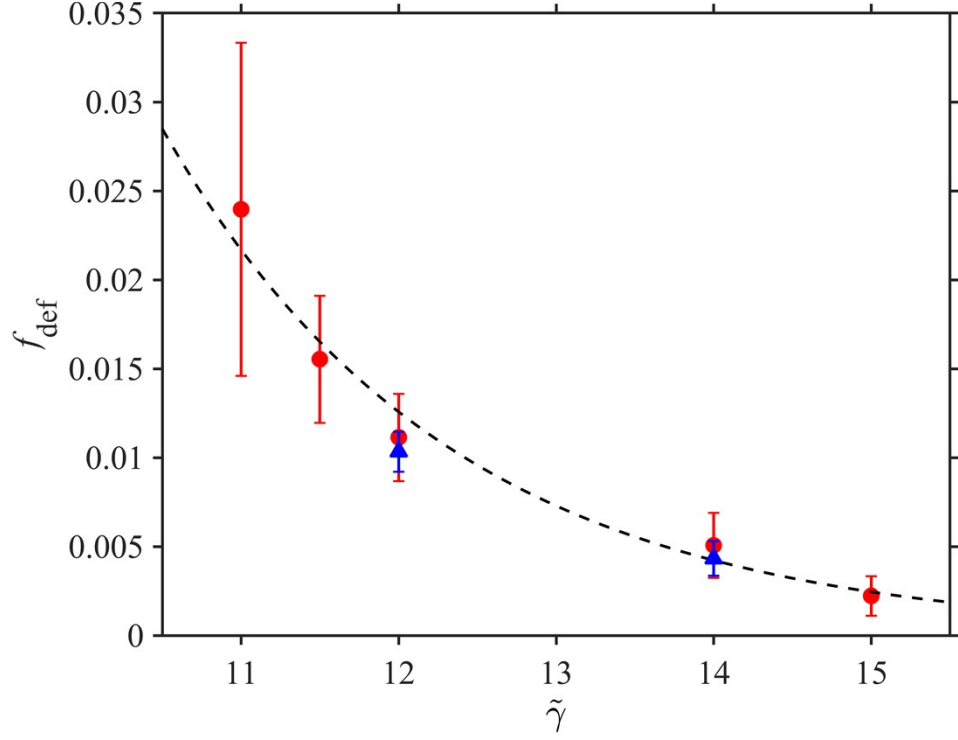

**Fig. S2** Concentration of topological defects  $f_{\text{def}}$ , estimated from the fraction of non-hexagonal particles, with  $\tilde{\gamma}$  for  $k = 100$  system (see also Fig. 6 in the main text). The red symbols correspond to simulations initialized from a perfect hexagonal lattice, while the blue symbols start from the final configuration obtained after equilibrating the system at  $k = 100$  and  $\tilde{\gamma} = 11$ . The black dashed line represents an exponential fit to the data in red. The system size is  $N = 900$  particles.

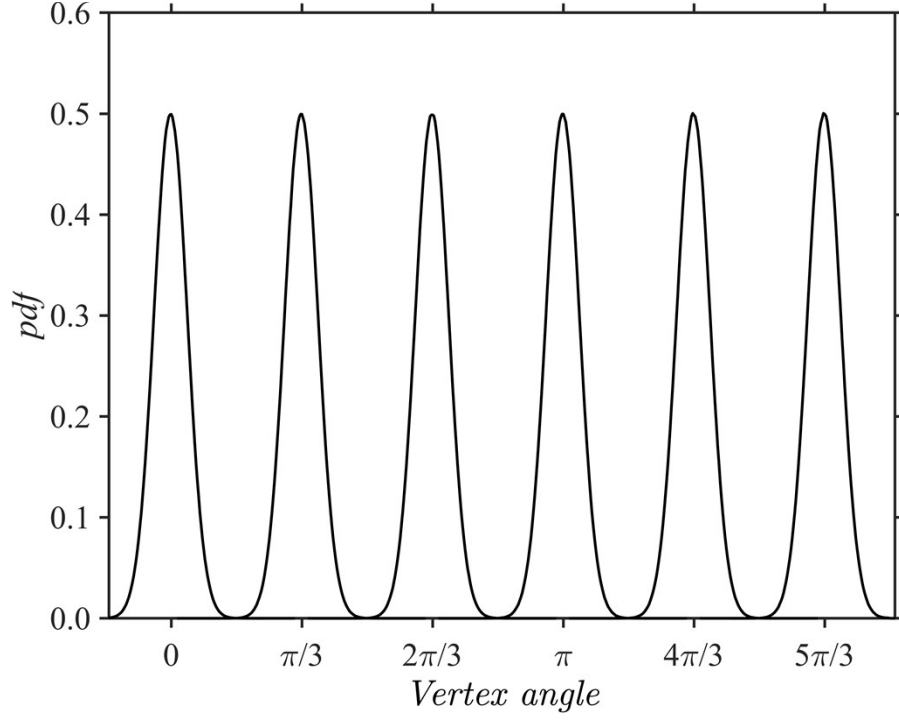

**Fig. S3** Probability density function (*pdf*) for vertex angles for the system at  $k = 100$  and  $\tilde{\gamma} = 60$ .

*Bond-orientational correlation function.* To analyze the characteristic correlation length scales associated with the order–disorder transition in our system, we quantified the bond-orientational

correlation function, defined as  $g_6(r = |\vec{r}_i - \vec{r}_j|) = \langle \psi_6(\vec{r}_i) \psi_6^*(\vec{r}_j) \rangle$  where  $\psi_6$  is the local bond-orientational order parameter as described by eqn (4) in the main text and  $\psi_6^*$  is the complex conjugate of  $\psi_6$ . We examined the absolute value  $|g_6|$  as a function of  $\tilde{r}$  for varying  $\tilde{\gamma}$  as shown in Fig. S4. We see that the disordered phase exhibits finite bond-orientational correlation lengths, whereas the ordered phase displays long-range correlations.

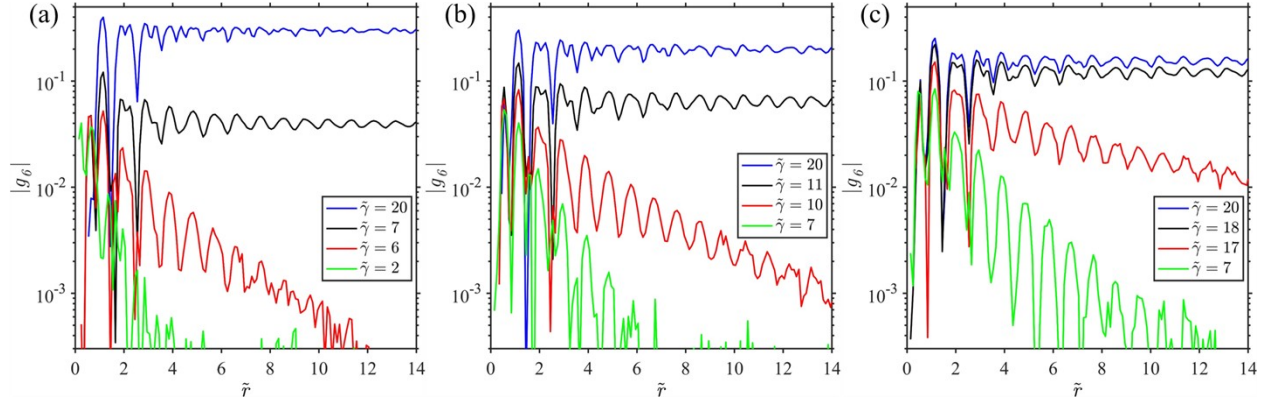

**Fig. S4** Absolute value of bond-orientational correlation function  $|g_6|$  with distance  $\tilde{r}$  for three systems with (a)  $k = 1000$  (b)  $k = 100$  and (c)  $k = 30$  for selected  $\tilde{\gamma}$  points in the disordered and ordered states. The simulation box dimensions are  $55.836 \times 64.476$ .

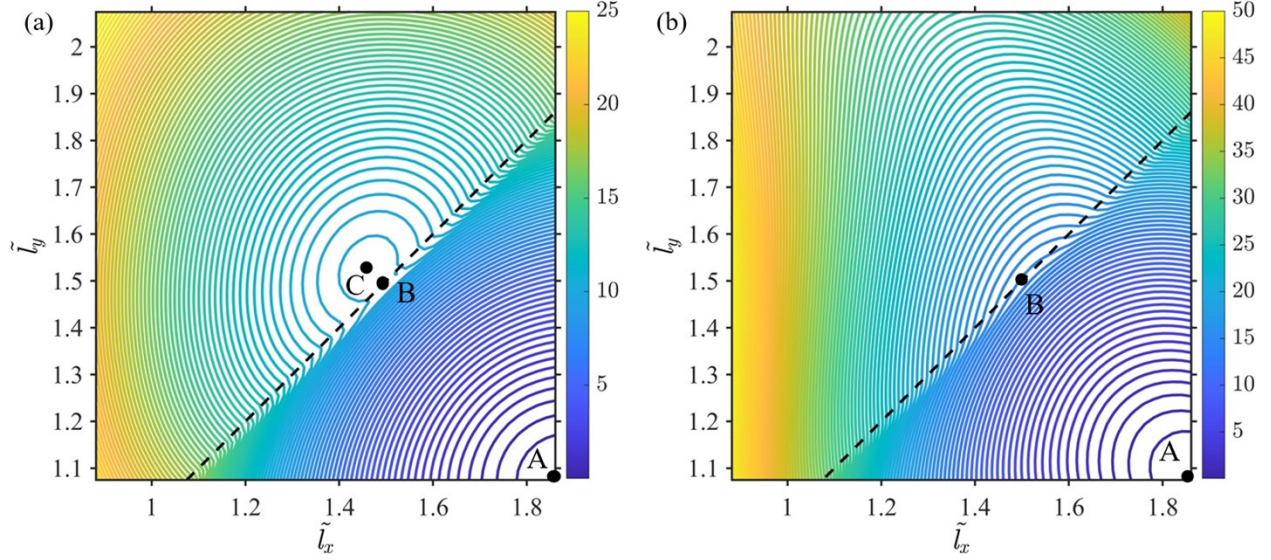

**Fig. S5** Contour maps of the system energies relative to the ground state, i.e., the total energy minus the energy of the ground state of the hexagonal crystal lattice, in the  $\tilde{l}_x - \tilde{l}_y$  plane at  $\tilde{\gamma} = 20$  for (a)  $k = 100$  and (b)  $k = 1000$ . The dashed line is drawn at  $\tilde{l}_x = \tilde{l}_y$  which is at the T1 transition. The closed circles labeled A, B, and C indicate a perfect hexagonal state, a state at the T1 transition, and a metastable defect-state, respectively. The corresponding representative configurations are shown in the main text in Fig. 7.

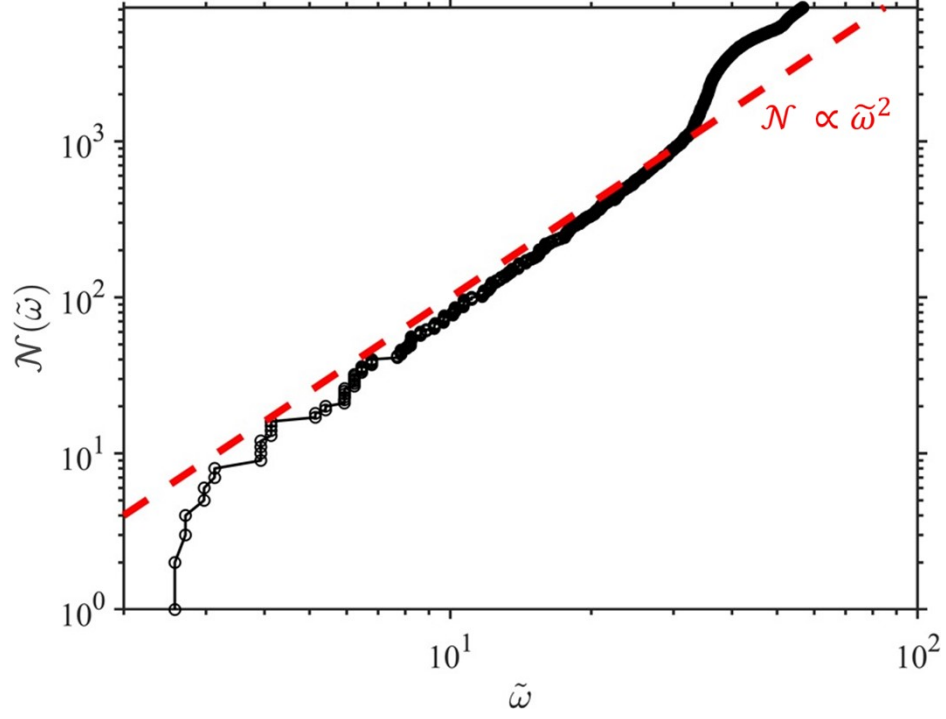

**Fig. S6** Cumulative number of normal modes,  $N(\tilde{\omega})$ , with normal mode frequency,  $\tilde{\omega}$  for Voronoi model with  $k = 100$ ,  $\tilde{\gamma} = 500$ . The red dashed line shows the Debye model prediction that the cumulative number of normal modes scales with the square of the frequency in the low-frequency regime.
